# Supplementary material for: UV-LED irradiation for biofouling reduction in drip irrigation emitters fed with wastewater effluent
Source: Royal Society of Chemistry journal article supplement (doi:10.1039/d4ew00271g), 2024-01-01
Supplement: d4ew00271g1.pdf [file d4ew00271g1.pdf]

## UV-LED irradiation for biofouling reduction in drip irrigation emitters fed by wastewater effluent.

Yael Gilboa<sup>a\*</sup>, Barak White<sup>a,†</sup>, Inbar Shlomo<sup>a</sup>, Karl G. Linden<sup>b</sup>, Eran Friedler<sup>a</sup>

a. Faculty of Civil and Environmental Eng., Technion - Israel Institute of Technology, Haifa 32000, Israel

b. Civil, Environmental, and Architectural Eng., University of Colorado Boulder, Boulder CO 80303, USA

\*Corresponding Author. E-mail address: [ygilboa@technion.ac.il](mailto:ygilboa@technion.ac.il)

† In memory of Barak White who sadly passed away in May 2022, before completing his research.

## Supporting Information

### S.1. Synthetic treated wastewater recipe

The following synthetic TWW recipe attempts to mimic the quality of Ma'ale Kishon TWW reservoir. This  $12.5 \cdot 10^6 \text{m}^3$  reservoir absorbs effluent from Haifa wastewater treatment plant and supply TWW to unlimited agricultural use in accordance with Israeli public health regulations.

The recipe includes Kaolin 15mg/L, Iron Sulfate ( $\text{FeSO}_4$ ) 0.43mg/L, Potassium Phosphate ( $\text{K}_2\text{HPO}_4$ ) 23mg/L, Calcium Chloride dehydrate ( $\text{CaCl}_2 \cdot 2\text{H}_2\text{O}$ ) 255mg/L, Sodium Bicarbonate ( $\text{NaHCO}_3$ ) 370mg/L, Sodium Chloride ( $\text{NaCl}$ ) 80.5mg/L, Magnesium Sulfate ( $\text{MgSO}_4 \cdot 7\text{H}_2\text{O}$ ) 180mg/L, Sodium Nitrate ( $\text{NaNO}_3$ ) 49.4mg/L, Ammonium Chloride ( $\text{NH}_4\text{Cl}$ ) 7.2mg/L, Urea ( $\text{CO}(\text{NH}_2)_2$ ) 5.41mg/L, Potassium Chloride ( $\text{KCl}$ ) 40.8mg/L, Potassium Sulphate ( $\text{K}_2\text{SO}_4$ ) 7.74mg/L, Peptone 28.9mg/L, and Beef extract 19.8mg/L.

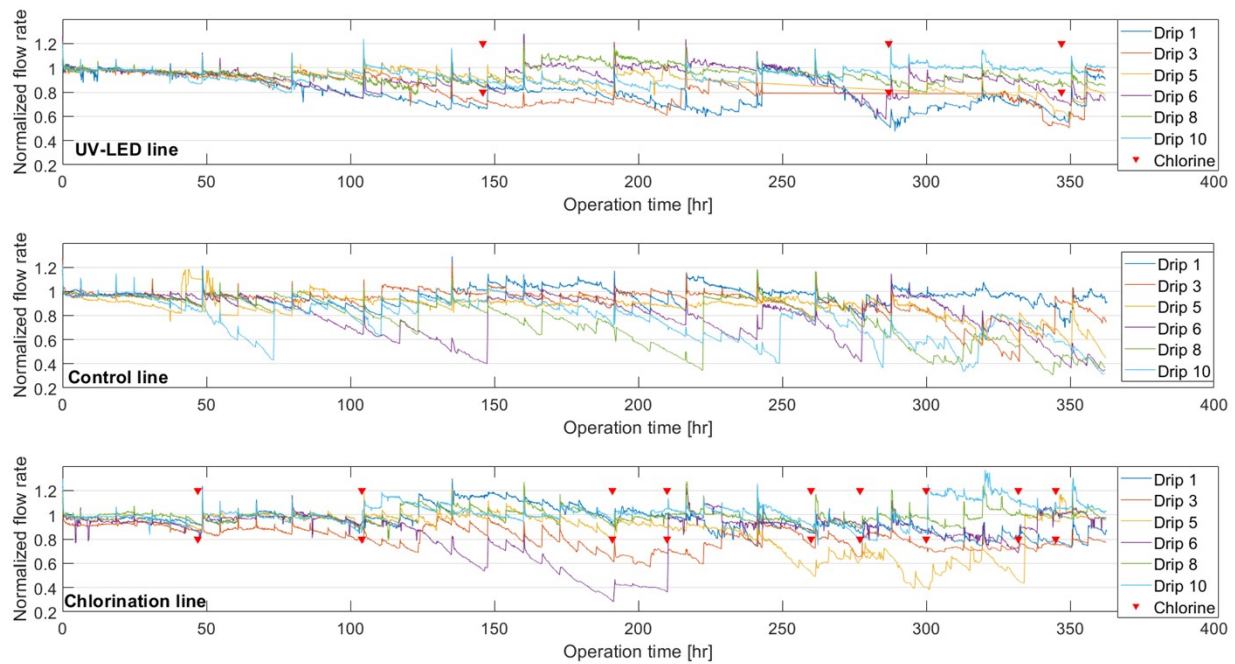

Figure S1: Normalized flowrate (flowrate divided by initial flowrate) measured by the tipping-bucket rain gauges vs. operation time for each treatment line. The red triangular signify maintenance of the pipelines by proactive chlorination.
